# Supplementary material
Source: Elsevier journal article supplement (https://www.sciencedirect.com/science/article/pii/S1578219019301696)
Supplement: mmc3 [file S1578219019301696:mmc3.pdf]

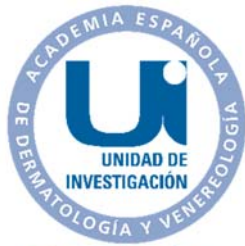

Fundación  
Piel Sana

# Guía de Práctica Clínica de la AEDV para el carcinoma de células de Merkel

TEXTO COMPLETO. 02/10/2018

## Autores:

*Javier Vázquez Doval*

Dermaclinic, Logroño.

*Beatriz Llombart Cussac*

Servicio de Dermatología. Instituto Valenciano de Oncología, Valencia, España

*Alicia Pérez Bustillo*

Servicio de Dermatología. Complejo Asistencial Universitario de León, León. España

*Sabela Paradela de la Morena*

Servicio de Dermatología. Complejo Hospitalario Universitario de A Coruña. A Coruña. España.

*María José Fuente González*

Servicio de Dermatología. Hospital Universitari Germans Trias i Pujol. Badalona. España.

*María Teresa Fernández Figueras*

Servicio de Anatomía Patológica. Hospital Universitari Germans Trias i Pujol. Badalona. España.

*María Jose Villanueva*

Servicio de Oncología. Complejo Hospitalario Universitario de Vigo. Vigo, España.

*Nuria Rodríguez Salas*

Servicio de Oncología Médica. Hospital Universitario La Paz. Madrid, España.

Profesora Asociada de la Facultad de Medicina y Directora de la Cátedra de Medicina de Innovación. Universidad Autónoma de Madrid. Madrid, España.

*Miguel Ángel Descalzo-Gallego*

Unidad de Investigación. Fundación Piel Sana Academia Española de Dermatología y Venereología. Madrid, España.

*Ignacio García-Doval*

Unidad de Investigación. Fundación Piel Sana Academia Española de Dermatología y Venereología. Madrid, España.

Servicio de Dermatología. Complejo Hospitalario Universitario de Vigo. Vigo, España.

*Luis Ríos-Buceta*

Servicio de Dermatología. Hospital Universitario Ramón y Cajal. Madrid, España.

## Tabla de contenido

|                                                                                                                                                                                                       |    |
|-------------------------------------------------------------------------------------------------------------------------------------------------------------------------------------------------------|----|
| Autores: .....                                                                                                                                                                                        | 1  |
| Introducción .....                                                                                                                                                                                    | 4  |
| Método empleado para la preparación del documento:.....                                                                                                                                               | 5  |
| PREGUNTA 1. ¿Es recomendable utilizar la regla AEIOU para el diagnóstico?, siendo a. asintomático, e. expansión rápida, i. inmunosupresión, o. older (+50 años), u. UV (piel expuesta al sol).? ..... | 7  |
| PREGUNTA 2. ¿Los marcadores de IHQ junto con la histopatología convencional permiten distinguir el carcinoma de Merkel de otros tumores y establecer un pronóstico? .....                             | 9  |
| PREGUNTA 3. ¿La realización de BSGC modifica la supervivencia de los pacientes? ....                                                                                                                  | 14 |
| PREGUNTA 4. ¿Si se hace BSCG con finalidad pronóstica, existe un tamaño mínimo del tumor primario que pueda predecir la negatividad de la biopsia y hacerla innecesaria? .....                        | 17 |
| PREGUNTA 5. ¿Es preferible emplear la PET-TAC respecto al TAC para la detección de metástasis a distancia? .....                                                                                      | 19 |
| PREGUNTA 6. Después de la cirugía, ¿está indicado el tratamiento de radioterapia en la zona del tumor incluso si los márgenes quirúrgicos son negativos? .....                                        | 21 |
| PREGUNTA 7. Sobre las cadenas ganglionares, clínicamente negativas, ¿se puede mantener una actitud expectante o conviene llevar a cabo radioterapia y/o disección ganglionar? .....                   | 25 |
| PREGUNTA 8. ¿Hay una frecuencia mínima de seguimiento recomendable para detectar las recurrencias? ¿Se puede establecer un cronograma de seguimiento? .....                                           | 28 |
| PREGUNTA 9. ¿Cuáles son las técnicas exploratorias más eficaces para detectar las recurrencias? .....                                                                                                 | 30 |
| BIBLIOGRAFIA .....                                                                                                                                                                                    | 32 |

## Introducción

El carcinoma de células de Merkel (CM) es un tumor cutáneo infrecuente (0.28 (95% CI: 0.15-0.40) casos por 100 000 personas año) y agresivo. El diagnóstico inicial y el estadiaje presentan variabilidad, y las técnicas a emplear podrían no estar disponibles en todos los centros. Por otro lado, la baja incidencia dificulta en muchos centros el poder adquirir experiencia. Existen guías de práctica clínica para el cuidado del CM, pero en contextos diferentes y con una cobertura parcial de los problemas que los dermatólogos han identificado como principales.

Por ello, la Fundación Piel Sana AEDV, ha impulsado la adaptación de Guías de Práctica Clínica (GPC) sobre el CM, formando parte del proyecto *Libro Blanco del Cáncer Cutáneo*.

El objetivo de esta guía es mejorar la calidad asistencial de los pacientes con CM, utilizando recomendaciones adaptadas a nuestro medio y basadas en los datos más válidos posibles. Esta guía revisa las principales técnicas diagnósticas empleadas en el diagnóstico inicial y estadiaje, así como los procedimientos terapéuticos para los tumores localizados.

## Método empleado para la preparación del documento:

Al existir Guías de Práctica Clínica (GPC) previas, hemos optado por adaptarlas, empleando el método ADAPTE. El protocolo empleado está disponible como material suplementario. (material suplementario 1)

Los paneles se seleccionaron entre los miembros del GECIDOC, atendiendo a su experiencia en el tema estudiado y a sus publicaciones sobre el mismo. Todos los panelistas declararon sus conflictos de interés antes de iniciar su participación y se excluyeron aquellos con un conflicto de intereses que se considerase relevante.

En el documento de alcance y objetivos se estableció como objetivo de la guía el aportar indicaciones sobre aspectos controvertidos del diagnóstico, los tratamientos médicos y quirúrgicos y el seguimiento de estos pacientes. El ámbito asistencial de la GPC es la asistencia dermatológica en España, siendo los usuarios diana los dermatólogos. Se excluyeron del ámbito de la GPC las estrategias de prevención y el tratamiento de la enfermedad diseminada (habitualmente realizado por oncólogos).

En los pasos siguientes, y siguiendo el método ADAPTE, se describió el proceso de atención y se formularon preguntas clínicas relevantes para cada uno de los pasos del mismo. Las preguntas más relevantes se seleccionaron mediante consenso. Simultáneamente se hizo una búsqueda de GPC existentes y se evaluaron por su calidad metodológica empleando el instrumento AGREE. Se seleccionaron para su consulta las GPC con mejores resultados y menos de cinco años de antigüedad. Cuando no obteníamos respuesta a alguna pregunta en las guías seleccionadas, la respuesta se buscó en las otras guías.

A partir de esta información se generaron las recomendaciones. En ellas se mantuvo la referencia a la fuente. Dos personas evaluaron el nivel de evidencia y grado de fuerza de la recomendación empleando.

Para la revisión externa de la guía se ha expuesto a todos los miembros de la AEDV, se ha enviado por correo a todos los miembros del GECIDOC y se ha

solicitado la revisión por parte de un oncólogo, patólogo, médico de atención primaria y paciente ( a través de la AECC).

PREGUNTA 1. ¿Es recomendable utilizar la regla AEIOU para el diagnóstico?, siendo a. asintomático, e. expansión rápida, i. inmunosupresión, o. older (+50 años), u. UV (piel expuesta al sol).?

## RESUMEN DE LA EVIDENCIA

Solamente un artículo, basado en una cohorte retrospectiva, unicéntrica, de 195 pacientes recogidos entre los años 1980 a 2007, menciona el acrónimo **AEIOU** siendo **A**: asintomático, **E**: crecimiento rápido (expansive), **I**: inmunosuprimido, **O**: >50 años (older), **U**: MCC primarios, en zonas expuestas a los rayos ultravioleta.

La opinión de los expertos es que la mayoría de estos tumores se diagnostican mediante los hallazgos de la anatomía patológica y no por las características clínicas

**Nivel de evidencia: 4**

## RECOMENDACIÓN DE LA AEDV

La regla AEIOU puede ser de utilidad para el diagnóstico del carcinoma de células de Merkel. Sin embargo, la sospecha diagnóstica se plantea por los datos clínicos solamente como primera opción en un 1% de los casos. El diagnóstico definitivo lo proporciona siempre el estudio de anatomía patológica.

**Fuerza de recomendación: C.**

## DISCUSIÓN



El acrónimo AEIOU aplicado al carcinoma de células de Merkel busca facilitar el diagnóstico clínico precoz de este tumor, de la misma manera que el ABCDE ayuda al diagnóstico precoz de un melanoma.

Fue propuesto en 2008 en una cohorte retrospectiva, unicéntrica, de 195 pacientes recogidos entre los años 1980 a 2007. En el estudio se recogen los datos demográficos, características clínicas, edad de presentación, estado inmunológico y velocidad de crecimiento (1).

#### RESULTADOS:

**A:** 88% of MCC estaban **asintomaticos**.

**E:** 63% crecimiento rápido (**expansive**)

**I:** 7.8% **inmunosuprimidos**

**O:** 90% >50 años (**older**).

**U:** 81% de los MCC primarios, se desarrollan en zonas expuestas a los rayos **ultravioleta**.

Este estudio tiene las limitaciones por haberse realizado en un sólo centro y ser retrospectivo. El acrónimo nunca ha sido validado de manera prospectiva y se ha criticado que un gran número de lesiones no CCM (benignas y malignas) podrían compartir al menos tres de esas características. Por lo ello no es posible saber su valor diagnóstico. En la serie el 89% de los CCM mostraban tres o más de los hallazgos mencionados (a, e, i, o, u). (Nivel de evidencia 4)

La clínica del CCM es variable y no específica, pero en la más frecuente es un nódulo eritematoso o violáceo, en una zona expuesta al sol, especialmente de cabeza y cuello, en una persona mayor (2).

El diagnóstico se basa en la observación clínica de la lesión, el reconocimiento completo de toda la superficie cutánea, la valoración de las cadenas ganglionares superficiales y la biopsia de la lesión que debe ser valorada por un patólogo experimentado.

PREGUNTA 2. ¿Los marcadores de IHQ junto con la histopatología convencional permiten distinguir el carcinoma de Merkel de otros tumores y establecer un pronóstico?

## **RESUMEN DE LA EVIDENCIA**

Es cierto en la mayoría de casos, pero la correlación clínico-patológica es igualmente imprescindible. Los marcadores más específicos del CCM son la queratina de bajo peso molecular Cam5.2, la citoqueratina 20 (CK20) y los neurofilamentos, especialmente, cuando la positividad es puntiforme perinuclear. También es constante la expresión de marcadores neuroendocrinos como sinaptofisina, cromogranina o CD56 que distingue el CCM de la mayoría de los tumores no neuroendocrinos. La negatividad para citoqueratina 7 (CK7) y TTF1 contribuye a descartar una metástasis de carcinoma de célula pequeña de pulmón u otros órganos, y la negatividad para proteína S100 y antígeno leucocitario común descartan melanoma y linfoma, respectivamente. El poliomavirus del carcinoma de células de Merkel (MCPyV) que suele detectarse con el anticuerpo CM2B4, está presente en un 70-80% de casos y una expresión difusa confirma el diagnóstico e indica mejor pronóstico. Además, se han descrito variaciones en el perfil de IHQ en este tumor, pero son menos específicas o su utilidad no está tan contrastada.

**Nivel de evidencia: 4**

## **RECOMENDACIÓN DE LA AEDV**

El diagnóstico de CCM debe complementarse siempre con técnicas inmunohistoquímicas. La positividad para queratinas de bajo peso molecular con patrón puntiforme es muy específica y el mínimo requerimiento necesario. Es recomendable ampliar el panel con citoqueratinas 7 y 20, y neurofilamentos, para descartar una metástasis de carcinoma de pulmón, el principal diagnóstico diferencial. La expresión de marcadores neuroendocrinos permite confirmar el diagnóstico. Dado que un porcentaje de estos tumores son híbridos o pueden

contener elementos heterólogos, la demostración de áreas de carcinoma escamoso o células de leiomioma no excluye el diagnóstico. La frecuente positividad del carcinoma de células de Merkel para Ber-EP4 hace esta tinción inadecuada para diferenciarlo de un carcinoma basocelular. La correlación clinicopatológica es siempre necesaria, puesto que algunos CCM presentan perfiles inmunohistoquímicos inusuales.

**Fuerza de recomendación: C**

## **DISCUSIÓN**

El carcinoma de células de Merkel (CCM) es un tumor de células de tamaño pequeño o intermedio que poseen un característico núcleo hiper cromático de cromatina finamente granular con aspecto en “sal y pimienta” (3,4). Las células pueden disponerse de forma difusa, trabecular o formando lóbulos con ocasionales empalizadas periféricas y hendiduras por retracción que recuerdan al carcinoma basocelular (4,5). En el estudio inmunohistoquímico, el tumor expresa CK de amplio espectro como las detectadas mediante el anticuerpo AE1/AE3, aunque son más características las de bajo peso molecular que pueden detectarse mediante Cam5.2 (3). La tinción para CK puede dibujar en todo el citoplasma, pero es más habitual que aparezca en forma de punto próximo al núcleo, ya que los filamentos de queratina forman a menudo un ovillo en esta localización. Esta positividad puntiforme perinuclear está presente en diversos tumores neuroendocrinos de célula pequeña, independientemente del origen (6). Típicamente los CCM son positivos para CK20 y negativos para CK7 (3,4). Además, los CCM siempre expresan marcadores neuroendocrinos (cromogranina, sinaptofisina, enolasa neural específica y CD56); la intensidad en la expresión de los diferentes marcadores varía de caso a caso (4). La positividad para enolasa neural específica es extremadamente inespecífica, pese a lo que su nombre indicaría y no se recomienda su uso, aunque puede tener en el futuro un papel como biomarcador de tumores neuroendocrinos (7). El anticuerpo CD56 es el más sensible para detectar diferenciación

neuroendocrina, pero es también positivo en células natural-killer, en procesos linfoproliferativos y algunos carcinomas basocelulares (8).

La expresión de neurofilamentos (NF) es otra característica muy frecuente en el CCM. Suele adoptar también la forma de punto perinuclear y, para algunos autores, sería tan específica en el diagnóstico del CCM como la CK20. Su estudio es especialmente útil cuando el patrón de queratinas no es el habitual (3,4,9)

Además, algunos CCM son positivos para C-kit (10), aunque es un marcador poco específico, y para Ber-EP4, lo que debe ser tenido en cuenta, ya que también éste es el marcador más típico del carcinoma basocelular y por tanto no es útil para distinguirlos. (5)

La detección del MCPyV, presente en aproximadamente un 80% de casos, contribuye a identificarlos e indica un mejor pronóstico. El marcador más usado es CM2B4, pero es importante recordar que la positividad en algunos casos débil y/o focal y que este tipo de expresión se ha descrito también en otras neoplasias (11,12).

En el diagnóstico diferencial tan importante como conocer los marcadores inmunohistoquímicos típicamente positivos, es saber cuáles son usualmente negativos en los CCM: CK7, TTF1, s100, Melan A, HMB-45, Sox10, antígeno leucocitario común, vimentina, proteína glial fibrilar ácida (GFAP) y marcadores de músculo liso o estriado (3,13) que contribuyen a descartar un CCM. Sospecharemos la metástasis de carcinoma de célula pequeña de pulmón ante un tumor que exprese CK7+, CK20-, NF- y TTF1+; un melanoma de célula pequeña frente a un tumor positivo para s100, Melan A, HMB45 y Sox-10 o un linfoma si expresa antígeno leucocitario común+. No obstante, se han descrito numerosos casos aislados de CCM con un perfil diferente al habitual (CK20-, CK7+) e incluso con expresión de TTF1 (14,15) o marcadores linfocitarios (16).

Otra característica del CCM que complica el diagnóstico diferencial inmunohistoquímico es que, de manera no excepcional, puede aparecer en combinación con otras neoplasias como carcinomas escamosos o tumores

anexiales. La presencia de áreas en el tumor cuyo perfil inmunohistoquímico no corresponde a un CCM no invalida el diagnóstico y obliga a considerar la posibilidad de una neoplasia combinada. Más rara es la presencia de elementos heterólogos, por ejemplo, áreas de leiomioma o rabdomioma cuya demostración tampoco excluye el diagnóstico (17,18).

La tabla I resume los perfiles inmunohistoquímicos más habituales en el diagnóstico diferencial del CCM:

| <b>Tumores de célula pequeña</b> | <b>CK20</b> | <b>CK7</b> | <b>NF</b> | <b>TTF1</b> | <b>Neuroend*</b> | <b>S100</b> | <b>LCA</b> | <b>MCPyV</b> |
|----------------------------------|-------------|------------|-----------|-------------|------------------|-------------|------------|--------------|
| <b>CCM</b>                       | <b>+</b>    | <b>-</b>   | <b>+</b>  | <b>-</b>    | <b>+</b>         | <b>-</b>    | <b>-</b>   | <b>+/-</b>   |
| <b>Pulmón</b>                    | <b>-</b>    | <b>+</b>   | <b>-</b>  | <b>+</b>    | <b>+</b>         | <b>-</b>    | <b>-</b>   | <b>-</b>     |
| <b>Melanoma</b>                  | <b>-</b>    | <b>-</b>   | <b>-</b>  | <b>-</b>    | <b>-</b>         | <b>+</b>    | <b>-</b>   | <b>-</b>     |
| <b>Linfoma</b>                   | <b>-</b>    | <b>-</b>   | <b>-</b>  | <b>-</b>    | <b>-</b>         | <b>-</b>    | <b>+</b>   | <b>-</b>     |

CCM: carcinoma de células de Merkel

\*Neuroend: marcadores neuroendocrinos (cromogranina, sinaptofisina, CD56 y enolasa neuronal específica)

## PREGUNTA 3. ¿La realización de BSGC modifica la supervivencia de los pacientes?

### **RESUMEN DE LA EVIDENCIA**

Actualmente, no existen estudios científicos que hayan evidenciado que la realización de la biopsia selectiva del ganglio centinela (BSGC) en el CCM modifique la supervivencia. Sin embargo, el conocimiento del estado ganglionar del paciente con CCM es el factor pronóstico independiente más importante. Aproximadamente un tercio de los pacientes con ganglios clínicamente negativos tienen enfermedad ganglionar microscópica. Por este motivo, la BSGC tiene un papel importante como herramienta de estadificación mínimamente invasiva. Múltiples estudios han demostrado que la estadificación ganglionar negativa patológica (pN0) muestra una supervivencia mejorada en comparación con la estadificación nodal negativa clínica (cN0).

### **Nivel de evidencia 5**

### **RECOMENDACIÓN DE LA AEDV**

En principio no se ha demostrado que la BSGC mejore la supervivencia, pero parece recomendable realizar BSGC en los pacientes con CCM sin afectación ganglionar clínicamente detectable siempre que sea posible.

### **Fuerza de recomendación: D**

### **DISCUSIÓN**

La BSGC se realiza en el CCM para la estadificación de los pacientes. Teóricamente, la realización de BSGC podría también mejorar la supervivencia, pues el conocimiento del estado ganglionar patológico en un estadio de micrometástasis podría ayudar a realizar un tratamiento más precoz. Sin embargo, la BSGC no ha demostrado claramente que modifique la supervivencia. Algunos trabajos sí que encuentran una mayor supervivencia en

aquellos pacientes a los que se les realiza BSGC frente a los pacientes que se les realiza observación (19), mientras otros estudios no encuentran diferencias (20).

En el CCM, las metástasis linfáticas regionales ocurren de forma frecuente y temprana, detectándose en aproximadamente un 30% de los pacientes (15-66%) en el momento del diagnóstico (20-25), y hasta en un 79% durante el curso de la enfermedad (26). En los pacientes sin afectación ganglionar clínica ni radiológica al diagnóstico es aconsejable realizar la técnica de la BSGC. Se han detectado micrometástasis en el 36% de las BSGC en los pacientes con CCM que no fueron detectadas ni en la exploración física ni en la realización de pruebas de imagen (27). Se ha observado un 30% de falsos negativos en la BSGC, disminuyendo al 22% al utilizar el análisis inmunohistoquímico (28). Su y cols. describen la mejor sensibilidad y especificidad con el anticuerpo anti-CK-20 a la hora de identificar micrometástasis ganglionares en pacientes con CM (29,30). Además, es conveniente que el patólogo informe de la carga tumoral de cada ganglio afecto, la localización en el ganglio (subcapsular o parénquima) y de la presencia o ausencia de extensión extracapsular (31).

Múltiples estudios han demostrado que la estadificación ganglionar negativa patológica (pN0) muestra una supervivencia mejorada en comparación con la estadificación ganglionar negativa clínica (cN0) (32).

La evolución de los pacientes con BSGC positiva o negativa es muy distinta. En un meta-análisis publicado por la Clínica Mayo se observó que de los 40 pacientes (67%) con BSGC negativa, el 97% de los casos no experimentó ninguna recurrencia durante el seguimiento. Sin embargo, del grupo de 20 pacientes con BSGC positiva, el 33% desarrolló recurrencias locorregionales o a distancia. El riesgo de recurrencia locorregional y/o de metástasis a distancia fue 19 veces mayor en los pacientes con BSGC positiva ( $P = 0.005$ ). Por tanto, en los pacientes con BSGC positiva será conveniente realizar una linfadenectomía completa o radioterapia adyuvante del territorio ganglionar (33).

Los pacientes con BSGC negativa deben ser seguidos también de forma rigurosa, debido a la posibilidad de falsos negativos (34) que se estima en un 20%. Los principales falsos negativos ocurren por factores técnicos en la localización y exéresis del ganglio, sobre todo en tumores de cabeza y cuello. La



cabeza y el cuello tienen un drenaje linfático muy variable (35) y es frecuente la presencia de ganglios centinelas múltiples, a nivel contralateral o bilateral, por lo que la BSGC tiene menos fiabilidad que en el tronco o las extremidades (36). Civantos y cols. encuentran en un 13.6% de los pacientes con CCM localizados en cabeza y cuello, un territorio de drenaje distinto al esperado al realizar la BSGC (37), lo que aumenta el riesgo de falsos negativos. Además, la BSGC es técnicamente más compleja en la cabeza y cuello debido a la presencia del nervio facial y la glándula parótida. Sin embargo, diversos artículos afirman que la BSGC es segura en esta localización (30), incluso cuando el ganglio centinela es intraparotídeo (38).

PREGUNTA 4. ¿Si se hace BSCG con finalidad pronóstica, existe un tamaño mínimo del tumor primario que pueda predecir la negatividad de la biopsia y hacerla innecesaria?

## **RESUMEN DE LA EVIDENCIA**

La mayoría de los estudios abogan por realizar siempre la BSGC independiente del tamaño tumoral. A diferencia del melanoma, no existen en el CCM indicadores clínicos (tamaño, localización) o patológicos (grosor, mitosis, invasión linfovascular) que nos ayuden a diferenciar a qué pacientes debemos realizar o no la BSGC

**Nivel de evidencia: 4**

## **RECOMENDACIÓN DE LA AEDV**

El tamaño tumoral no debe ser un criterio relevante a la hora de decidir la realización de la BSGC.

**Fuerza de recomendación: C**

## **DISCUSIÓN**

Durante un tiempo se cuestionó si en los CCM  $\leq 1$  cm era necesaria la realización de la BSGC. Stokes y cols. afirmaron en un estudio que los CCM  $\leq 1$  cm presentaban afectación ganglionar con poca frecuencia. Sólo dos pacientes de 54 (4%) con tumores  $\leq 1$  cm tenían metástasis ganglionares, comparado con los 51 de 213 (24%) con tumores de  $>1$  cm ( $P < 0.0001$ ) (39). Este artículo ha sido muy criticado debido a que en el estudio no se realizaron técnicas IHQ ni en el tumor primario (para detectar tumores erróneamente diagnosticados como CCM) ni en la BSGC (para la detección de micrometástasis (40).

En el artículo publicado por Tai y cols. (41), 105 de los casos presentados tenían  $\leq 1$  cm de los que nueve (9%) tenían afectación ganglionar detectada

clínicamente. En este sentido, Iyer y cols.(42) realizan un estudio retrospectivo de 8044 CCM y encuentran un 14% de riesgo de afectación ganglionar en tumores de 0.5 cm, ascendiendo al 25% de riesgo si el tamaño es de 1.7cm y 36% en lesiones de  $\geq 6$  cm. Además, observan que el número de ganglios linfáticos afectados al diagnóstico es factor predictivo para la supervivencia (0 ganglios, 76% de supervivencia a los 5 años; 1 ganglio, 50%; 2 ganglios, 47%; 3-5 ganglios, 42%;  $\geq 6$  ganglios, 24%) y por tanto podría ayudar a manejar mejor al paciente.

Debido a que la resección amplia puede alterar el drenaje linfático del tumor primario, la BSGC debería realizarse en primer lugar y durante el mismo acto quirúrgico que la escisión del tumor (43).

Los factores que se correlacionaron con una BSGC positiva fueron el tamaño tumoral (25%  $\leq 2$  cm vs 45%  $> 2$  cm;  $P = 0.02$ ) y la presencia de invasión linfovascular (55% en aquellos en que estaba presente y 4% en los que no,  $P < 0.01$ ) (43). El rápido crecimiento, el espesor tumoral importante, un número elevado de mitosis y un patrón infiltrativo se asociaron también con una BSGC positiva (43). Sin embargo, ninguno de estos parámetros nos ayuda a diferenciar a qué pacientes debemos realizar o no la BSGC. Por tanto, actualmente, la mayoría de artículos abogan por realizar siempre la BSGC en todos los CCM primarios independientemente del tamaño tumoral (44).

## PREGUNTA 5. ¿Es preferible emplear la PET-TAC respecto al TAC para la detección de metástasis a distancia?

### **RESUMEN DE LA EVIDENCIA**

En los pacientes con CCM se recomienda realizar técnicas de imagen para el estudio de extensión. Sin embargo, no existe un consenso sobre las más adecuadas. Se ha recomendado el uso de radiografía simple de tórax y otras pruebas según la sospecha clínica (TAC de tórax y abdomen, RM cerebral, ecografía abdominal y ganglionar).

Algunos estudios demuestran que el uso de PET-TAC cambia la estadificación inicial y el tratamiento en el 16%-22% de los casos y la dosis de radioterapia en el 15%.

**Nivel de evidencia: 3a**

### **RECOMENDACIÓN DE LA AEDV**

Se recomienda realizar un PET-TAC para estadificación inicial, sobre todo si existe alto riesgo de metástasis a distancia .

**Fuerza de la recomendación: B**

### **DISCUSIÓN**

Una vez que se ha diagnosticado el tumor primario como CCM, el estudio inicial debe incluir un examen de los ganglios linfáticos locorregionales y una radiografía simple de tórax para descartar que se trate de una metástasis de un carcinoma neuroendocrino pulmonar. Clásicamente, el valor de otras pruebas de imagen era controvertido. Sin embargo, actualmente se considera que podrían ser útiles según la sospecha clínica, debido al elevado riesgo de metástasis a distancia (45,46,47) y pueden incluirse en el estudio inicial de estos pacientes: ecografía ganglionar, placa de tórax, TAC, RM (48).

La PET con 18-fluorodeoxiglucosa (18FDG) combinada con la tomografía computada está adquiriendo una mayor importancia en el diagnóstico por imagen del CCM, sobre todo en los pacientes con alto riesgo de metástasis a distancia (49,50).

En una revisión de 102 pacientes con CCM (51), se observó que la información obtenida en las imágenes de PET-TAC cambiaba el estadio y el tratamiento inicial en el 22% de los pacientes y la dosis de radioterapia en el 15%. Se obtuvieron resultados similares en otra revisión de 90 pacientes, 16% de los cuales fueron reestadificados basándose en el estudio inicial mediante PET-TAC (52). En otra revisión retrospectiva de 18 pacientes, también se registró una variación en la estadificación del 33% y un cambio de manejo en el 43% de los casos (53).

Además, la PET-TAC puede identificar metástasis óseas indetectables mediante TAC. Según un metaanálisis basado fundamentalmente en estudios retrospectivos de centros de referencia, la sensibilidad y especificidad del PET-TAC serían del 90% y 98%, respectivamente (54).

En aquellos casos en los que la PET-TAC no está disponible, se podrían utilizar TAC o RM con contraste.

PREGUNTA 6. Después de la cirugía, ¿está indicado el tratamiento de radioterapia en la zona del tumor incluso si los márgenes quirúrgicos son negativos?

## **RESUMEN DE LA EVIDENCIA**

Estudios observacionales de registros proporcionan evidencias de la utilidad de la radioterapia para prevenir las recidivas y prolongar la supervivencia mostrando asociación entre el empleo de radioterapia adyuvante y mejora de la supervivencia estadísticamente significativa en los estadios I y II.

Existe un estudio aleatorizado, interrumpido prematuramente (55), y un metaanálisis (56) de estudios observacionales en los que se demuestra que la radioterapia adyuvante tras la cirugía disminuye el riesgo de recidiva locorregional, sin demostrarse cambios en la supervivencia. (Nivel de evidencia 2a)

Se ha detectado una mayor supervivencia global en los pacientes que recibieron radioterapia tras la cirugía, sobre todo si el tumor primario era mayor de 2 cm (57). Sin embargo, en un estudio retrospectivo publicado en 2013 se evidenció un aumento de la supervivencia global pero no de la supervivencia específica lo que de nuevo plantearía dudas sobre la utilidad de la radioterapia en estos pacientes (58). (Nivel de evidencia 2b)

Mientras no se publiquen estudios amplios, prospectivos, randomizados, parece razonable considerar el empleo de la radioterapia en aquellos casos con alto riesgo de recidiva: tumores grandes, con patrón histológico agresivo, invasión linfovascular o pacientes inmunodeprimidos. (Nivel de evidencia 2b)

## **RECOMENDACIÓN DE LA AEDV**

Se puede omitir la radioterapia, sobre el lugar de asiento del tumor primario en tumores pequeños (< 1cm), que se han sometido a extirpaciones amplias, con márgenes quirúrgicos libres y sin factores de riesgo como invasión linfovascular o inmunosupresión (59).

Sin embargo, cuando la lesión extirpada es de más de 2 cm de dimensión mayor o los márgenes quirúrgicos no están libres se debería considerar siempre el empleo de radioterapia adyuvante sobre el lecho quirúrgico, mientras no existan evidencias de lo contrario. La radioterapia debe ser administrada lo antes posible, ya que su retraso puede asociarse a un empeoramiento del pronóstico.

**Grado de recomendación: B**

## **DISCUSIÓN**

El papel de la radioterapia posoperatoria en el tratamiento del CCM, es controvertido y no existe un acuerdo absoluto sobre su empleo adyuvante.

La guía NCCN establece que se puede omitir la radioterapia, sobre el lugar de asiento del tumor primario en tumores pequeños (< 1cm), que se han sometido a extirpaciones amplias, con márgenes quirúrgicos libres y sin factores de riesgo como invasión linfovascular o inmunosupresión (59).

Cuando no se aplica radioterapia, algunas series de casos muestran, una mayor tasa de recurrencias tras cirugía (60,61), aunque la revisión cuidadosa, revela que en algunos pacientes se emplearon márgenes de resección muy pequeños (incluso de tan sólo 5 mm). (Nivel de evidencia 4)

Sin embargo, cuando las escisiones locales del primario son amplias, varias series de casos o cohortes de alto riesgo de sesgo han descrito una tasa relativamente baja de recurrencias (4-14%), que no disminuye de manera significativa si se añade radioterapia adyuvante después de la cirugía (62,63,64,65). (Nivel de evidencia 4)

Un metaanálisis de 132 artículos, sobre un total de 1254 pacientes, pone de manifiesto que el control de la enfermedad tumoral es mejor cuando se aplica radioterapia sobre lecho tumoral después de la cirugía comparado con sólo con cirugía, disminuyendo la tasa de recidivas del 39 al 12% (56). No obstante, este trabajo tiene muchas limitaciones: no se incluyó ningún estudio prospectivo

randomizado, el tipo de cirugía empleado no está bien documentado, ni tampoco la dosis y campo de radiación y otros tratamientos adicionales. (Nivel de evidencia 4)

En una cohorte unicéntrica retrospectiva, sobre un total de 176 pacientes, se determinó que la tasa de recurrencia con cirugía más radioterapia era de 19%, similar a la de otros trabajos retrospectivos, mostrando que la edad, el tamaño tumoral y la utilización de radioterapia, son factores predictivos de la recidiva local, pero sólo la radioterapia mantiene la significación en el análisis multivariante (66). (Nivel de evidencia 4)

Trabajos recientes (2016) están proporcionando mayores evidencias de la utilidad de la radioterapia para prevenir las recidivas y prolongar la supervivencia de estos pacientes. Así, en un estudio sobre 6908 casos de carcinoma de células de Merkel procedentes del National Cancer Data Base (NCDB) en el cual se valoraron si existían diferencias en la supervivencia según los tratamientos adyuvantes empleados, se concluye que la radioterapia adyuvante se asoció con una mejora estadísticamente significativa en los estadios I y II (67). Por el contrario, ni la radioterapia ni la quimioterapia se asocia con una mejor supervivencia en el estadio III (67). (Nivel de evidencia 3b) Estos hallazgos vienen a corroborar los de un análisis retrospectivo previo (57) que incluía 1187 pacientes de la base de datos SEER (Programa estadounidense de Vigilancia, Epidemiología y Resultados Finales) del Instituto Nacional del Cáncer (NCI), el cual había demostrado una mayor supervivencia global en pacientes que recibieron radioterapia adyuvante tras la cirugía, frente a los que no (mediana de supervivencia: 63 meses vs 45 meses,  $p=0.0002$ ). La mejoría en la supervivencia fue mayor en los pacientes con tumores mayores de 2 cm (mediana de supervivencia: 50 meses vs 21 meses,  $p=0.0003$ ).

Mientras no se publiquen estudios amplios, prospectivos, randomizados, parece razonable considerar el empleo de la radioterapia adyuvante sobre el territorio de asiento del tumor primario en aquellos casos con alto riesgo de recidiva: tumores grandes, con patrón histológico agresivo, invasión linfovascular o pacientes inmunodeprimidos (68). La radioterapia adyuvante debe administrarse pocas semanas después del tratamiento quirúrgico, puesto



que el retraso puede asociarse a un peor resultado (69). También puede ser útil como tratamiento paliativo, para control local de la enfermedad.

Basándonos en la evidencia actual, el objetivo fundamental será extirpar el CCM alcanzando márgenes quirúrgicos libres de tumor, los márgenes de 1cm suelen ser suficientes para lesiones pequeñas. Para CCM de más de 2cm en su dimensión mayor, deben emplearse márgenes de 2 cm si es posible, y aunque los aspectos cosméticos no deben ser pasados por alto, la eliminación completa del tumor es la prioridad fundamental.

PREGUNTA 7. Sobre las cadenas ganglionares, clínicamente negativas, ¿se puede mantener una actitud expectante o conviene llevar a cabo radioterapia y/o disección ganglionar?

### **RESUMEN DE LA EVIDENCIA**

Existe un único ensayo clínico (55) llevado a cabo con pacientes en estadio I que se trataron con cirugía y radioterapia en el lecho tumoral y que se aleatorizaron en dos grupos: observación frente a radioterapia del territorio ganglionar regional. Sin embargo, el ensayo se cerró prematuramente debido a la disminución en el reclutamiento de pacientes debido a la práctica creciente de la BSGC. Aún así se reclutaron 83 pacientes cuyo análisis no mostró un aumento de la supervivencia global en el grupo sometido a la radioterapia del territorio ganglionar, pero sí una disminución significativa del riesgo de recidiva regional (0 vs 16.7%).

En esta situación la recomendación unánime de las guías es llevar a cabo BSGC y en función de los resultados, si estos son positivos, recomendar la radioterapia y/o la disección ganglionar.

Sólo se recomienda la radioterapia como tratamiento único en aquellos pacientes no candidatos a estudio de ganglio centinela (contraindicación, problemas quirúrgicos o rechazo por el paciente) o territorios ganglionares con dificultad para detectar el ganglio centinela, como es el caso de cabeza y cuello.

**Nivel de evidencia: 3b**

### **RECOMENDACIÓN DE LA AEDV**

En los pacientes con carcinoma de Merkel y territorio ganglionar clínicamente no afectado se recomienda la realización de biopsia selectiva ganglio centinela en todos los casos en que sea posible.

- Se recomendará radioterapia en el territorio ganglionar si:

- No se realizó BSGC: si hay adenopatías clínicamente evidentes o si clínicamente son negativas pero existe riesgo de enfermedad subclínica
- Se realizó BSGC y:
  - Fue negativa: solo si existe alto riesgo para un falso negativo (fallo secundario a localización –cabeza y cuello-, exéresis amplia previa, otros problemas técnicos)
  - Fue positiva y no se realizó linfadenectomía
- Se realizó linfadenectomía y existía afectación de múltiples ganglios o afectación extracapsular

### **Fuerza de la recomendación: B**

## **DISCUSIÓN**

Las guías recomiendan la BSGC, en aquellos pacientes con ganglios clínicamente negativos (59). Y esto se basa en múltiples estudios que demuestran que de un 25% a un 30% de los ganglios clínicamente negativos tenían micrometástasis. Además, el estudio de Jouari et al (55) demostró una disminución significativa de la recidiva local en el grupo de pacientes que, sin evidencia clínica de afectación ganglionar, se habían sometido a radioterapia de las cadenas ganglionares de drenaje (0 vs 16,7%). No obstante, otro estudio observacional de 721 pacientes que concluye que la RT adyuvante no reduce la tasa de recidivas regionales (70)

Por otro lado, se considera que el CCM es altamente radiosensible y quizás es por esto que, a pesar de la ausencia de más estudios prospectivos que avalen la decisión de irradiar, la guía de la NCCN recomienda que se considere la irradiación de los territorios ganglionares para erradicar la enfermedad subclínica cuando no es posible hacer estudio de ganglio centinela (59).

Existen discrepancias respecto a esta recomendación de la NCCN, ya que para algunos autores esto sería someter al paciente a un tratamiento innecesario, teniendo en cuenta que en áreas de drenaje linfático ambiguo podríamos irradiar zonas que no están en riesgo de ser invadidas por el tumor. Para otros, autores, la posibilidad de falsos negativos en el estudio de ganglio centinela en algunas localizaciones (especialmente de cabeza y cuello) hace recomendable la irradiación del territorio ganglionar adyacente (69,71). Para otros, la decisión de irradiar el territorio ganglionar debe depender de factores clínicos tales como el tamaño de la lesión y su localización o factores dependientes del paciente como la edad o su situación clínica que contraindique la realización de BSGC (72,73).

PREGUNTA 8. ¿Hay una frecuencia mínima de seguimiento recomendable para detectar las recurrencias? ¿Se puede establecer un cronograma de seguimiento?

## **RESUMEN DE LA EVIDENCIA**

No existen estudios científicos diseñados para establecer el seguimiento óptimo posterior al tratamiento del CCM.

El CCM se asocia con un alto riesgo de recurrencia local, ganglionar y afectación metastásica. El riesgo de recurrencia depende fundamentalmente del estadio al diagnóstico y es más elevado durante los 2-3 primeros años desde la intervención del tumor primario. Por este motivo la mayoría de las guías recomiendan un seguimiento estrecho durante los 2-3 primeros años tras el tratamiento inicial. El tiempo mínimo de seguimiento se establece en 5 años, pero sería recomendable seguimiento de por vida.

**Nivel de evidencia: 5**

## **RECOMENDACIÓN DE LA AEDV**

No existe evidencia a favor de un determinado protocolo de seguimiento posterior al tratamiento inicial del CCM.

Para establecer la pauta de visitas y la duración del seguimiento deben considerarse el riesgo de recurrencia, el estadio de la enfermedad, la edad, la existencia de inmunosupresión, el tratamiento recibido (márgenes libres o no, radioterapia adyuvante o no), la ansiedad del paciente, las preferencias del médico, así como los recursos asistenciales disponibles.

Se realizará una vigilancia más intensiva, con visitas más frecuentes, durante los 2-3 primeros años y en pacientes con estadios más avanzados o mayor riesgo de recurrencia. Durante los 2-3 primeros años se recomienda programar las revisiones cada 1-6 meses dependiendo de estos factores. A partir de los 3 años se recomienda realizarla cada 6-12 meses. En cuanto a la duración del

seguimiento se aconseja monitorizar a los pacientes un mínimo de 5 años, siendo recomendable una visita anual a partir de los 5 años.

### **Fuerza de recomendación: D**

## **DISCUSIÓN**

El CCM es un tumor agresivo con una alta tasa de recurrencia local, metástasis ganglionares regionales y metástasis a distancia (74). En el estudio de Allen y col. que incluyó 251 pacientes con diagnóstico de CCM, el 91% de los pacientes que presentaron recurrencia del tumor lo hicieron en los 2 primeros años tras el diagnóstico, principalmente en los 9 primeros meses. El lugar más frecuente de recurrencia fue la cadena ganglionar regional (62). Distintos estudios han demostrado que el estadio al diagnóstico es el principal predictor de supervivencia (32, 62, 75,76).

No existen estudios que avalen un determinado protocolo de seguimiento en los pacientes con CCM tras el tratamiento inicial. Todas las guías publicadas proponen un seguimiento estrecho los 2-3 primeros años tras el diagnóstico, incluyendo exploración física cutánea y ganglionar completa. Recomiendan pruebas de imagen complementarias en función de los hallazgos en la exploración física y clínicos. Los pacientes de alto riesgo podrían beneficiarse de visitas más frecuentes y de pruebas de imagen de rutina, siempre de forma individualizada, dado que no todos son subsidiarios de tratamiento posterior ni tampoco está claro que la detección precoz de enfermedad metastásica mejore su pronóstico; en cualquier caso, las pruebas de sistema nervioso central sólo se solicitan ante sospecha de su afectación.

El seguimiento debe prolongarse al menos 5 años, aunque varias guías lo recomiendan de por vida (59,76-82,83). Los tratamientos inmunosupresores deberán minimizarse en la medida de lo posible.

## PREGUNTA 9. ¿Cuáles son las técnicas exploratorias más eficaces para detectar las recurrencias?

### RESUMEN DE LA EVIDENCIA

No hay estudios que establezcan las técnicas exploratorias más adecuadas en el seguimiento de los pacientes con CCM.

Todas las guías recomiendan realizar exploración física completa cutánea y ganglionar en cada visita. Las pruebas de imagen deben indicarse en función de la anamnesis y de los resultados de la exploración física. No obstante, la ecografía de los ganglios linfáticos regionales se recomienda de rutina en algunas guías. Sin embargo, incluso en los pacientes de alto riesgo las pruebas de imagen se harán de forma individualizada ya que no todos son candidatos a tratamientos adicionales ni está claro que la detección precoz de las metástasis mejore el pronóstico.

Estudios recientes sugieren la utilidad de la seriación de los títulos de anticuerpos frente a proteínas de la cápside y anticuerpos frente a la oncoproteína del MCPyV con resultados aún controvertidos.

**Nivel de evidencia: 4**

### RECOMENDACIÓN DE LA AEDV

La exploración física, observando toda la superficie cutánea corporal, el área donde asienta el tumor primario, así como las cadenas ganglionares superficiales debe realizarse en cada visita a todos los pacientes.

Ante la ausencia de consenso sobre las técnicas complementarias a practicar en cada estadio clínico y en cada visita de seguimiento, las pruebas radiológicas y serológicas de rutina deberán establecerse desde los comités locales de tumores cutáneos, en función de los recursos asistenciales disponibles en cada institución. Ante la sospecha clínica de recurrencia de la enfermedad se realizarán las pruebas de imagen pertinentes para la re-estadificación del paciente. La PET/TC tienen una sensibilidad mayor que la TC y se considera de

utilidad para detectar enfermedad subclínica.

### **Fuerza de recomendación: C**

## **DISCUSIÓN**

La PET/TC ha demostrado tener una mayor sensibilidad comparada con la TC y se considera útil para detectar enfermedad subclínica (53, 84)

En los últimos años, se ha propuesto la seriación de títulos de anticuerpos frente al MCPyV como una herramienta útil en el manejo y seguimiento de los pacientes con CCM (80, 85). Sin embargo, los resultados de la utilidad de los anticuerpos frente a la cápside y los anticuerpos frente a las oncoproteínas (antígenos T) aún son controvertidos.

Paulson y col. en un estudio que incluyó 219 pacientes con diagnóstico reciente de CCM y seriación de los títulos de anticuerpos contra la oncoproteína del MCPyV sugieren que pacientes con títulos bajos tienen un mayor riesgo de recurrencia, en estos pacientes puede estar indicado un seguimiento clínico y radiológico más estrecho. Por otro lado, en pacientes con títulos elevados que presentan una caída de los títulos tras el tratamiento inicial, la probabilidad de recurrencia es baja. En estos pacientes las pruebas de imagen solo estarían indicadas ante cambios clínicos o ante un aumento de los títulos durante la seriación (86).

En 143 pacientes con CCM, Samimi y col. observan un aumento de la supervivencia global y una menor probabilidad de recurrencia en pacientes con niveles altos de anticuerpos frente a la cápside a nivel basal, pero a diferencia del estudio de Paulson y col. no lo encuentran en pacientes con anticuerpos frente a las oncoproteínas (antígenos T). En este estudio durante el seguimiento sólo los anticuerpos frente al antígeno T se asocian con recurrencia o progresión a partir de los 12 meses (87).



## BIBLIOGRAFIA

1. Heath M, Jaimes N, Lemos B, et al. Clinical characteristics of Merkel cell carcinoma at diagnosis in 195 patients: the AEIOU features. *J Am Acad Dermatol* 2008;58:375–381.
2. Coggs K, Tello T, North JP, et al. Merkel cell carcinoma: an update and review. Pathogenesis, diagnosis and staging. *J Am Acad Dermatol* 2018;78:433-442.
3. Harms PW. Update on Merkel cell carcinoma. *Clin Lab Med*. 2017;37:485-501.
4. Fernández-Figueras MT, Puig L, Musulen E, et al. Expression profiles associated with aggressive behavior in Merkel cell carcinoma. *Mod Pathol*. 2007;20:90-101.
5. Stanoszek LM, Wang GY, Harms PW. Histologic Mimics of Basal Cell Carcinoma. *Arch Pathol Lab Med*. 2017 Nov;141:1490-1502.
6. Rund CR, Fischer EG. Perinuclear dot-like cytokeratin 20 staining in small cell neuroendocrine carcinoma of the ovary (pulmonary-type). *Appl Immunohistochem Mol Morphol*. 2006;14:244-8.
7. Isgrò MA, Bottoni P, Scatena R. Neuron-Specific Enolase as a Biomarker: Biochemical and Clinical Aspects. *Adv Exp Med Biol*. 2015;867:125-43
8. Castillo JM, Knol AC, Nguyen JM, Khammari A, Saint-Jean M, Dreno B. Immunohistochemical markers of advanced basal cell carcinoma: CD56 is associated with a lack of response to vismodegib. *Eur J Dermatol*. 2016;26(5):452-459.
9. Bobos M, Hytiroglou P, Kostopoulos I, Karkavelas G, Papadimitriou CS. Immunohistochemical distinction between merkel cell carcinoma and small cell carcinoma of the lung. *Am J Dermatopathol*. 2006;28:99-104.
10. Husein-EI Ahmed H, Ramos-Pleguezuelos F, et al. Histological Features, p53, c-Kit, and Poliovirus Status and Impact on Survival in Merkel Cell Carcinoma Patients. *Am J Dermatopathol*. 2016;38:571-9.
11. Moshiri AS, Doumani R, Yelistratova L, et al. Polyomavirus-Negative Merkel Cell Carcinoma: A More Aggressive Subtype Based on Analysis

- of 282 Cases Using Multimodal Tumor Virus Detection. *J Invest Dermatol.* 2017;137:819-827.
12. Mertz KD, Schmid M, Burger B, et al. Detection of Merkel cell polyomavirus in epidermodysplasia- verruciformis-associated skin neoplasms. *Dermatology.* 2011;222:87-92.
  13. Tilling T, Wladykowski E, Failla AV, Houdek P, Brandner JM, Moll I. Immunohistochemical analyses point to epidermal origin of human Merkel cells. *Histochem Cell Biol.* 2014;141:407-21.
  14. Calder KB, Coplowitz S, Schlauder S, Morgan MB. A case series and immunophenotypic analysis of CK20-/CK7+ primary neuroendocrine carcinoma of the skin. *J Cutan Pathol.* 2007;34:918-23.
  15. Reddi DM, Puri PK. Expression of focal TTF-1 expression in a case of CK7/CK20-positive Merkel cell carcinoma. *J Cutan Pathol.* 2013;40:431-3.
  16. Sauer CM, Haugg AM, Chteinberg E, et al. Reviewing the current evidence supporting early B-cells as the cellular origin of Merkel cell carcinoma. *Crit Rev Oncol Hematol.* 2017;116:99-105.
  17. Martin B, Poblet E, Rios JJ, et al. Merkel cell carcinoma with divergent differentiation: histopathological and immunohistochemical study of 15 cases with PCR analysis for Merkel cell polyomavirus. *Histopathology.* 2013;62:711-22.
  18. Fernández-Figueras MT, Puig L, Gilaberte M, et al. Merkel cell (primary neuroendocrine) carcinoma of the skin with nodal metastasis showing rhabdomyosarcomatous differentiation. *J Cutan Pathol.* 2002;29:619-22.
  19. Kachare SD, Wong JH, Vohra NA, Zervos EE, Fitzgerald TL. Sentinel lymph node biopsy is associated with improved survival in Merkel cell carcinoma. *Ann Surg Oncol.* 2014;21:1624-30.
  20. Kouzmina M, Leikola J, Bohling T, Koljonen V. Positive sentinel lymph node biopsy predicts local metastases during the course of disease in Merkel cell carcinoma. *J Plast Surg Hand Surg.* 2013;47:139-43.
  21. Mojica P, Smith D, Ellenhorn JD. Adjuvant radiation therapy is associated with improved survival in Merkel cell carcinoma of the skin. *J Clin Oncol.* 2007;25:1043-7.

22. Morrison WH, Peters LJ, Silva EG, Wendt CD, Ang KK, Goepfert H. The essential role of radiation therapy in securing locoregional control of Merkel cell carcinoma. *Int J Radiat Oncol Biol Phys*. 1990;19:583-91.
23. Toker C. Trabecular carcinoma of the skin. *Arch Dermatol*. 1972;105:107-10.
24. Santamaria-Barria JA, Boland GM, Yeap BY, Nardi V, Dias-Santagata D, Cusack JC, Jr. Merkel cell carcinoma: 30-year experience from a single institution. *Ann Surg Oncol*. 2013;20:1365-73.
25. Gupta SG, Wang LC, Penas PF, Gellenthin M, Lee SJ, Nghiem P. Sentinel lymph node biopsy for evaluation and treatment of patients with Merkel cell carcinoma: The Dana-Farber experience and meta-analysis of the literature. *Arch Dermatol*. 2006;142:685-90.
26. Tai P. A practical update of surgical management of merkel cell carcinoma of the skin. *ISRN surgery*.2013:850797.
27. Koljonen V, Bohling T, Virolainen S. Tumor burden of sentinel lymph node metastasis in Merkel cell carcinoma. *J Cutan Pathol*.2011;38:508-13.
28. Knoepp SM, Hookim K, Placido J, Fields KL, Roh MH. The application of immunocytochemistry to cytologic direct smears of metastatic merkel cell carcinoma. *Diagn Cytopathol*. 2013 Aug;41:729-33.
29. Su LD, Lowe L, Bradford CR, Yahanda AI, Johnson TM, Sondak VK. Immunostaining for cytokeratin 20 improves detection of micrometastatic Merkel cell carcinoma in sentinel lymph nodes. *J Am Acad Dermatol*. 2002;46:661-6.
30. Schmalbach CE, Lowe L, Teknos TN, Johnson TM, Bradford CR. Reliability of sentinel lymph node biopsy for regional staging of head and neck Merkel cell carcinoma. *Arch Otolaryngol Head Neck Surg*. 2005;131:610-4.
31. Ko JS, Prieto VG, Elson PJ, Vilain RE, Pulitzer MP, Scolyer RA, et al. Histological pattern of Merkel cell carcinoma sentinel lymph node metastasis improves stratification of Stage III patients. *Mod Pathol*. 2016;29:122-30.
32. Harms KL, Healy MA, Nghim P. Analysis of prognostic Factors from 9387 Merkel Cell Carcinoma Cases From the Basis for the New 8TH Edition AJCC Staging System. *Ann Surg Oncol*. 2016. 23(11):3564-3571.
33. Mehrany K, Otley CC, Weenig RH, Phillips PK, Roenigk RK, Nguyen TH. A meta-analysis of the prognostic significance of sentinel lymph node status in Merkel cell carcinoma. *Dermatol Surg*. 2002;28:113-7.
34. Gunaratne DA, Howle JR, Veness MJ. Sentinel lymph node biopsy in Merkel cell carcinoma: a 15-year institutional experience and statistical analysis of 721 reported cases. *Br J Dermatol*. 2016;174:273-81.

35. Willis AI, Ridge JA. Discordant lymphatic drainage patterns revealed by serial lymphoscintigraphy in cutaneous head and neck malignancies. *Head Neck*. 2007;29:979-85.
36. Stadelmann WK, Cobbins L, Lentsch EJ. Incidence of nonlocalization of sentinel lymph nodes using preoperative lymphoscintigraphy in 74 consecutive head and neck melanoma and Merkel cell carcinoma patients. *Annals Plastic Surgery*. 2004;52:546-9.
37. Civantos FJ, Moffat FL, Goodwin WJ. Lymphatic mapping and sentinel lymphadenectomy for 106 head and neck lesions: contrasts between oral cavity and cutaneous malignancy. *Laryngoscope*. 2006;112(3 Pt 2 Suppl 109):1-15.
38. Loree TR, Tomljanovich PI, Cheney RT, Hicks WL, Jr., Rigual NR. Intraparotid sentinel lymph node biopsy for head and neck melanoma. *Laryngoscope*. 2006;116:1461-4.
39. Stokes JB, Graw KS, Dengel LT, Swenson BR, Bauer TW, Slingluff CL, Jr., et al. Patients with Merkel cell carcinoma tumors  $\leq 1.0$  cm in diameter are unlikely to harbor regional lymph node metastasis. *J Clin Oncol*. 2009;27:3772-7.
40. Sarnaik AA, Zager JS, Cox LE, Ochoa TM, Messina JL, Sondak VK. Routine omission of sentinel lymph node biopsy for merkel cell carcinoma  $\leq 1$  cm is not justified. *J Clin Oncol*. 2008;26:e7.
41. Tai P, Yu E, Assouline A, Lian JD, Kurian J, Krzisch C. Management of Merkel cell carcinoma with emphasis on small primary tumors--a case series and review of the current literature. *J Drugs Dermatol*. 2010;9:105-10.
42. Iyer JG, Storer BE, Paulson KG, Lemos B, Phillips JL, Bichakjian CK, et al. Relationships among primary tumor size, number of involved nodes, and survival for 8044 cases of Merkel cell carcinoma. *J Am Acad Dermatol*. 2014;70:637-43.
43. Schwartz JL, Griffith KA, Lowe L, Wong SL, McLean SA, Fullen DR, et al. Features predicting sentinel lymph node positivity in Merkel cell carcinoma. *J Clin Oncol*. 2011; 29:1036-41.
44. Tarantola TI, Vallow LA, Halyard MY, Weenig RH, Warschaw KE, Grotz TE, et al. Prognostic factors in Merkel cell carcinoma: Analysis of 240 cases. *J Am Acad Dermatol*. 2013;68:425-32.
45. Anderson SE, et al. MRI of Merkel cell carcinoma: histologic correlation and review of the literature. *AJR Am J Roentgenol*. 2005;185:1441-

1448.

46. Johnson TM, et al. Staging workup, sentinel node biopsy, and follow-up tests for melanoma: update of current concepts. *Arch Dermatol*. 2004;140:107–113
47. Gupta SG, et al Sentinel lymph node biopsy for evaluation and treatment of patients with Merkel cell carcinoma: the Dana-Farber experience and meta-analysis of the literature. *Arch Dermatol*. 2006;142:685–690.
48. Enzenhofer E, Ubl P, Czerny C, Erovic BM. Imaging in patients with Merkel cell carcinoma. *J Skin Cancer* 2013;2013: 973123.
49. Yao M, et al. Merkel cell carcinoma: two case reports focusing on the role of fluorodeoxyglucose positron emission tomography imaging in staging and surveillance. *Am J ClinOncol*. 2005;28:205–210.
50. Zager JS, et al. Imaging of Merkel cell carcinoma. *Curr Probl Cancer* 2010; 34: 65–76.
51. Siva S, Byrne K, Seel M, Bressel M, Jacobs D, Callahan J, Laing J, Macmanus MP, Hicks RJ. 18 F-FDG PET Provides High-Impact and Powerful Prognostic Stratification in the Staging of Merkel Cell Carcinoma: A 15-year Institutional Experience. *J Nucl Med* 2013; 54:1223-1229
52. Hawryluk EB, et al. Positron emission tomography/computed tomography imaging in Merkel cell carcinoma: a study of 270 scans in patients at the Dana-Farber/Brigham and Women's Cancer Center. *J Am Acad Dermatol* 2013;68:592-599 .
53. Concannon R, Larcos GS, Veness M. The impact of (18)F-FDG PET-CT scanning for staging and management of Merkel cell carcinoma: results from Westmead Hospital, Sydney, Australia. *J Am Acad Dermatol* 2010;62:76-84.
54. Treglia G, Kakhki VR, Giovanella L, Sadeghi R. Diagnostic Performance of Fluorine-18 -Fluorodeoxyglucose Positron Emission Tomography in Patients with Merkel Cell Carcinoma: A Systematic Review and Meta-Analysis. *Am J Clin Dermatol* 2013;14:437-447
55. Jouary T, Leyral C, Dreno B, Doussau A, Sassolas B, Beylot-Barry M et al; Groupe de Cancérologie Cutanée of the Société Française de Dermatologie. Adjuvant prophylactic regional radiotherapy versus observation in stage I Merkel cell carcinoma: a multicentric prospective randomized study. *Ann Oncol* 2012;23:1074-80.

56. Lewis KG, Weinstock MA, Weaver AL, Otley CC. Adjuvant local irradiation for Merkel cell carcinoma. *Arch Dermatol.* 2006;142:693–700.
57. Mojica P, Smith D, Ellenhorn JD. Adjuvant radiation therapy is associated with improved survival in Merkel cell carcinoma of the skin. *J Clin Oncol.* 2007;25:1043-7.
58. Kim JA, Choi AH. Effect of radiation therapy on survival in patients with resected Merkel cell carcinoma: a propensity score surveillance, epidemiology, and end results database analysis. *JAMA Dermatol.* 2013;149:831-8.
59. Bichakjian CK, Olencki T, Assi AZ, et al. NCCN Clinical practice guidelines in oncology. Merkel Cell Carcinoma. Version 1, 2018. Available at: [NCCN.org](http://NCCN.org)
60. Eng TY, Boersma MG, Fuller CD, Cavanaugh SX, Valenzuela F, Herman TS. Treatment of Merkel cell carcinoma. *Am J Clin Oncol.* 2004;27:510–515.
61. Meeuwissen JA, Bourne RG, Kearsley JH. The importance of postoperative radiation therapy in the treatment of Merkel cell carcinoma. *Int J Radiat Oncol Biol Phys.* 1995; 31:325–331.
62. Allen PJ, Bowne WB, Jaques DP, Brennan MF, Busam K, Coit DG. Merkel cell carcinoma: prognosis and treatment of patients from a single institution. *J Clin Oncol.* 2005;23:2300–2309.
63. Medina-Franco H, Urist MM, Fiveash J, Heslin MJ, Bland KI, Beenken SW. Multimodality treatment of Merkel cell carcinoma: case series and literature review of 1024 cases. *Ann Surg Oncol.* 2001;8:204–208.
64. Veness MJ, Perera L, McCourt J, et al. Merkel cell carcinoma: improved outcome with adjuvant radiotherapy. *Aust N Z J Surg.* 2005;75:275–281.
65. Boyer JD, Zitelli JA, Brodland DG, D'Angelo G. Local control of primary Merkel cell carcinoma: review of 45 cases treated with Mohs micrographic surgery with and without adjuvant radiation. *J Am Acad Dermatol.* 2002;47: 885–892.
66. Hui AC1, Stillie AL, Seel M, Ainslie J. Merkel cell carcinoma: 27-year experience at the Peter MacCallum Cancer Centre. *Int J Radiat Oncol Biol Phys.* 2011;80:1430-5.

67. Bhatia S, Storer BE, Iyer JG, Moshiri A, Parvathaneni U, Byrd D, Sober AJ, Sondak VK, Gershenwald JE, Nghiem P. Adjuvant Radiation Therapy and Chemotherapy in Merkel Cell Carcinoma: Survival Analyses of 6908 Cases From the National Cancer Data Base. *J Natl Cancer Inst.* 2016; 31;108. pii: djw042. doi: 10.1093/jnci/djw042. Print 2016 Sep
68. Zoe Rush, Ryan C Fields, Nancy Lee, and Isaac Brownell · Radiation therapy in the management of Merkel cell carcinoma: current perspectives. *Expert Rev Dermatol.* 2011;6: 395-404.
69. Hruby G, Scolyer RA, Thompson JF. The important role of radiation treatment in the management of Merkel cell carcinoma. *Br J Dermatol* 2013;169:975–982.
70. Sentinel lymph node biopsy in Merkel cell carcinoma: a 15-year institutional experience and statistical analysis of 721 reported cases. Gunaratne DA, Howle JR, Veness MJ . *Br J Dermatol.* 2016 Feb;174:273-81
71. Tseng J, Dhungel B, Mills JK, Diggs BS, Weerasinghe R, Fortino J, Vetto JT. Merkel cell carcinoma: what makes a difference? *Am J Surg.* 2015;209:342-6
72. Prince MD, Cruse CW, Sondak VK, Zager JS. Surgical management of primary and regional Merkel cell carcinoma. In: Sondak VK, Messina JL, Zager JS, Deconti RD, eds. *Merkel Cell Carcinoma: A Multidisciplinary Approach.* London, United Kingdom: Imperial College Press; 2011:181–200.
73. Lebbe, C, Becker, J. C, Grob, J. J, Malvehy, J, Del Marmol, V, Pehamberger, H, Garbe, C. Diagnosis and treatment of Merkel Cell Carcinoma. European consensus-based interdisciplinary guideline. *European Journal of Cancer,* 2015; 51, 2396-2403
74. Ott MJ, Tanabe, et al. Multimodality management of Merkel cell carcinoma. *Arch Surg* 1999;134:388-393.
75. Albores-Saavedra J, et al. Merkel cell carcinoma demographics, morphology, and survival based on 3870 cases: a population based study. *J Cutan Pathol.* 2010 ;37:20-7
76. Sridharan V, et al. Merkel Cell Carcinoma: A Population Analysis on Survival. *J Natl Compr Canc Netw.* 2016;14:1247-1257.
77. Bichakjian C, et al. Merkel cell carcinoma: critical review with guidelines for multidisciplinary management. *Cancer* 2007;110:1-12.

78. Lebbe C, et al. Diagnosis and treatment of Merkel Cell Carcinoma. European consensus-based interdisciplinary guideline. *Eur J Cancer*. 2015 Nov;51:2396-403.
79. Boccara O, et al. Guidelines for the diagnosis and treatment of Merkel cell carcinoma – Cutaneous Oncology Group of the French Society of Dermatology. *Eur J Dermatol* 2012; 22: 375-9
80. Wang TS, et al. Merkel Cell Carcinoma: Update and Review. *Semin Cutan Med Surg* 2011;30:48-56
81. Schrama D. Merkel cell carcinoma – pathogenesis, clinical aspects and treatment. *JEADV* 2011;25, 1121–1129
82. Becker J, et al. Short German guidelines: Merkel cell carcinoma. *J Dtsch Dermatol Ges*. 2008;6 Suppl 1:S15-6
83. Alberta Health Services. Merkel cell carcinoma. Clinical Practice Guideline. [Consultado el 21 Jun 2018]. Disponible en: <https://www.albertahealthservices.ca/assets/info/hp/cancer/if-hp-cancer-guide-cu004-merkel-cell.pdf>
84. Ibrahim SF<sup>1</sup>, Ahronowitz I, McCalmont TH, Hernandez Pampaloni M, Ryan JL, Yu SS. 18F-fluorodeoxyglucose positron emission tomography-computed tomography imaging in the management of Merkel cell carcinoma: a single-institution retrospective study. *Dermatol Surg*. 2013 Sep;39(9):1323-33.
85. Llombart B et al. Actualización en el carcinoma de células de Merkel: claves de las técnicas de imagen, factores pronósticos, tratamiento y seguimiento. *Actas Dermosifiliogr*. 2017;108:98-107.
86. Paulson KG, et al. Viral Oncoprotein Antibodies as a Marker for Recurrence of Merkel Cell Carcinoma: A Prospective Validation Study. *Cancer* 2017;123:1464-74 .
87. M. Samimi, et al. Prognostic value of antibodies to Merkel cell polyomavirus T antigens and VP1 protein in patients with Merkel cell Carcinoma. *Br J Dermatol* 2016; 174:715–716.
